# Supplementary material for: Phosphatized mild-prepared-NiCo LDHs cabbage-like spheres exhibit excellent performance as a supercapacitor electrode
Source: Royal Society of Chemistry journal article supplement (doi:10.1039/d0nj03070h), 2020-11-18
Supplement: d0nj03070h1.pdf [file d0nj03070h1.pdf]

## Supplementary information

### **Phosphatized Mild-prepared-NiCo LDHs Cabbage-like Sphere Exhibits Excellent Performance as Supercapacitor Electrode**

Guorong Wang<sup>a</sup>, Yanbing Li<sup>a</sup>, Tiansheng Zhao<sup>b</sup>, Zhiliang Jin<sup>a\*</sup>

*a. School of Chemistry and Chemical Engineering, Ningxia Key Laboratory of Solar Chemical Conversion Technology, Key Laboratory for Chemical Engineering and Technology, State Ethnic Affairs Commission, North Minzu University, Yinchuan 750021, P.R.China*

*b. State Key Laboratory of High-Efficiency Utilization of Coal and Green Chemical Engineering, Ningxia University, Yinchuan 750021, China*

Corresponding Author: [zl-jin@nun.edu.cn](mailto:zl-jin@nun.edu.cn)(Z.Jin); [zhaots@nxu.edu.cn](mailto:zhaots@nxu.edu.cn) (T. S. Zhao)

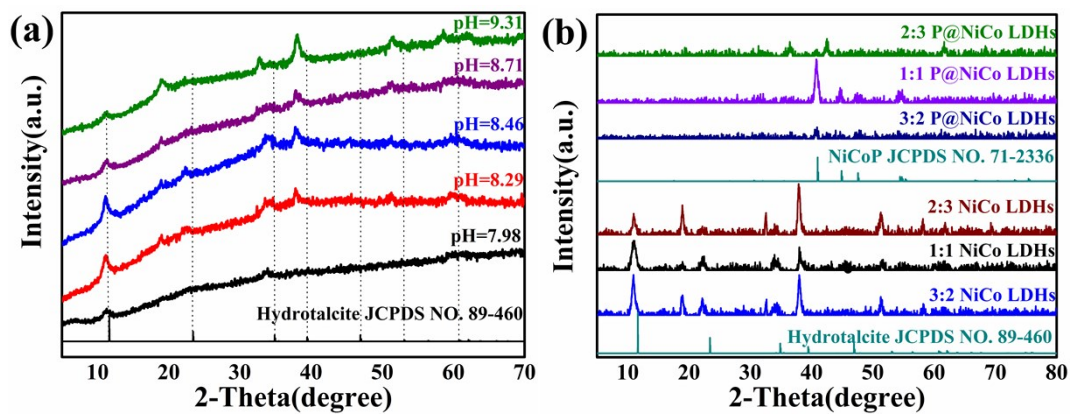

Fig. S1. XRD patterns of (a) the obtained NiCo-LDHs under the different initial pH values and (b) 3:2 NiCo LDHs,

1:1 NiCo LDHs, 2:3 NiCo LDHs, 3:2 P@NiCo LDHs, 1:1 P@NiCo LDHs, 2:3 P@NiCo LDHs.

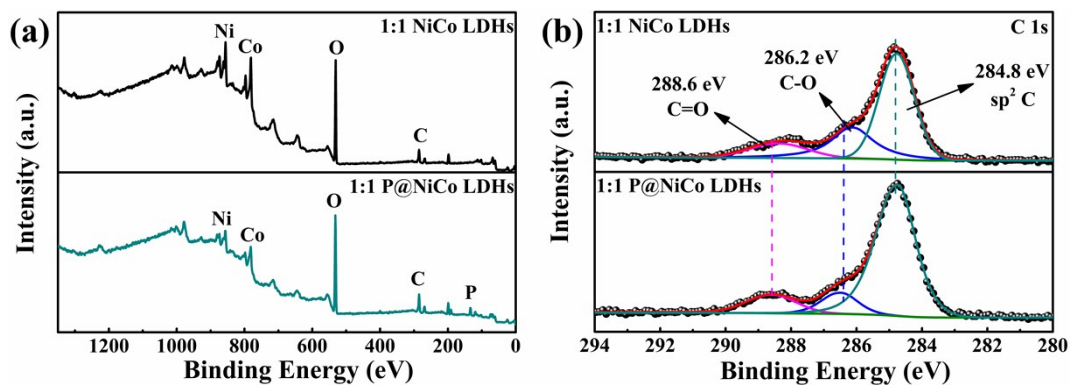

**Fig. S2.** The (a) full XPS spectra and (b) C 1s spectra of the 1:1 NiCo LDHs and 1:1 P@NiCo-LDHs.

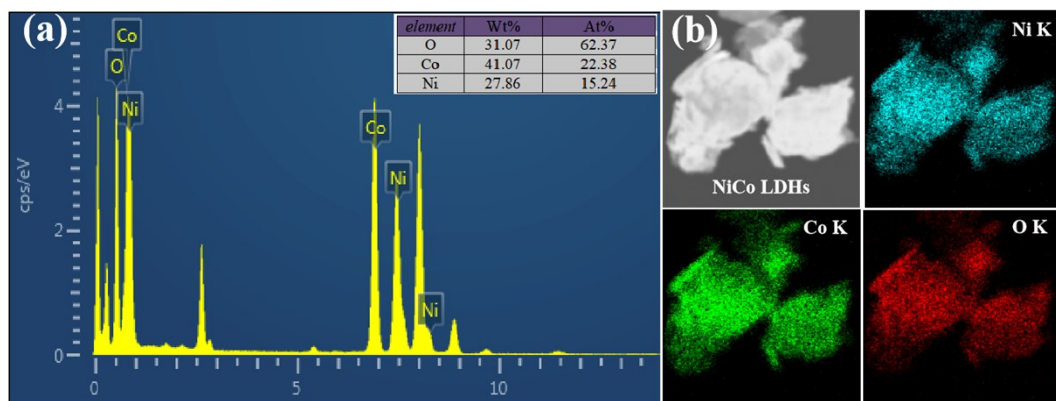

**Fig. S3.** TEM images of (a) EDX pattern of the NiCo LDHs, (b) EDS mapping of Ni, Co and O element on LDHs microspheres.

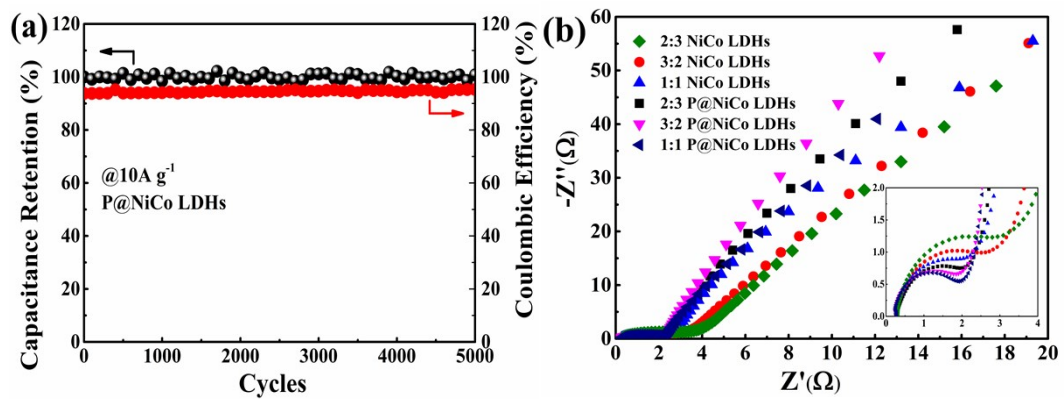

**Fig. S4.** (a) Cyclic performance of P@NiCo LDHs at a current density of  $10\text{A}\cdot\text{g}^{-1}$  for 5000 cycles; (b) The EIS plots of different prepared electrode.

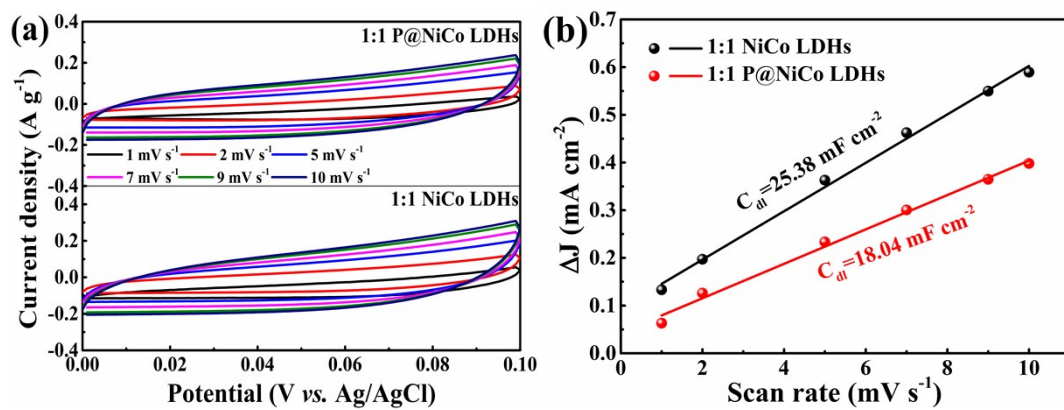

Fig. S5. (a) CV curves in the potential region 0-0.1 V to determine the ECSAs of the electrode materials before and after phosphating. (b) The measured capacitive currents plotted as a function of scan rate.

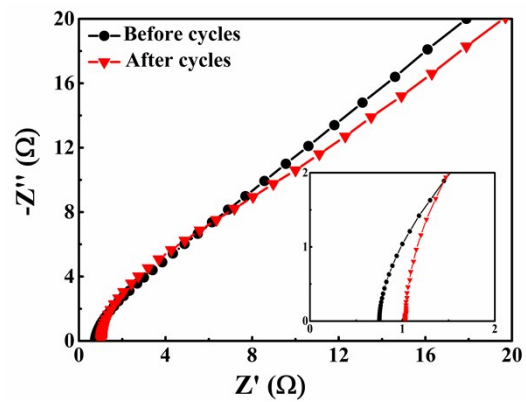

**Fig. S6.** Nyquist plot for P@NiCo LDHs//P@NiCo LDHs symmetric supercapacitor in the frequency range of 0.01 Hz to 100 kHz before and after cycles.

**Table. S1.** Structural parameters obtained from N<sub>2</sub> adsorption isotherms analysis.

| samples     | SBET(m <sup>2</sup> g <sup>-1</sup> ) <sup>a)</sup> | Pore volume(cm <sup>3</sup> g <sup>-1</sup> ) <sup>b)</sup> | Average pore size(nm) <sup>b)</sup> |
|-------------|-----------------------------------------------------|-------------------------------------------------------------|-------------------------------------|
| NiCo LDHs   | 60.93                                               | 0.16                                                        | 21.79                               |
| P@NiCo LDHs | 80.42                                               | 0.23                                                        | 13.65                               |

a)Obtained from BET method;

b)Total pore volume taken from the N<sub>2</sub> adsorption volume at a relative pressure (P/P<sub>0</sub>) of 0.99.
